# Supplementary material for: Magnetic lanthanide sensor with self-ratiometric time-resolved luminescence for accurate detection of epithelial cancerous exosomes
Source: Royal Society of Chemistry journal article supplement (doi:10.1039/d4tb00497c), 2024-01-01
Supplement: d4tb00497c1.pdf [file d4tb00497c1.pdf]

## Supplementary Information

### **Magnetic lanthanide sensor with self-ratiometric time-resolved luminescence for accurate detection of epithelial cancerous exosomes**

Yating Zeng<sup>a,b</sup>, Xuekang Wang<sup>a,b</sup>, Nanhang Zhu<sup>a,b</sup>, Yue Yu<sup>a,b</sup>, Xingyou Wang<sup>a,b</sup>, Ke  
Kang<sup>a,b</sup>, Yao Wu<sup>a,b</sup>, Qiangying Yi<sup>a,b\*</sup>

<sup>a</sup> *National Engineering Research Center for Biomaterials, Sichuan University,  
Chengdu 610064, P. R. China*

<sup>b</sup> *College of Biomedical Engineering, Sichuan University, Chengdu 610064, P. R.  
China*

*Corresponding Author:*

*\*E-mail: qyi@scu.edu.cn (Q.Y.).*

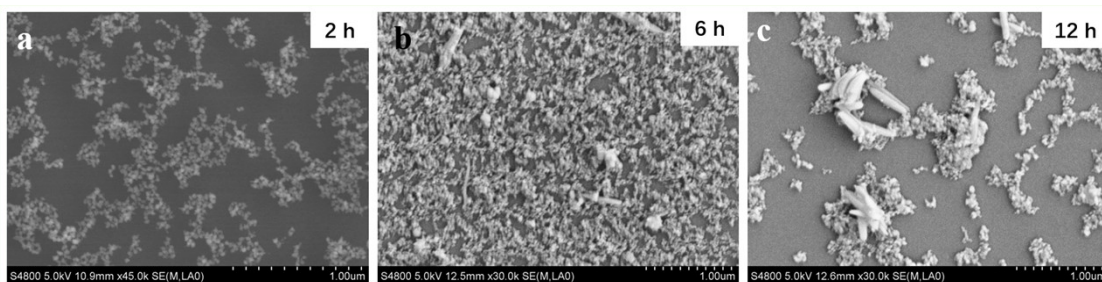

Fig. S1. Different hydrothermal reaction times of  $\text{NaYF}_4:\text{Tb}@PEI$

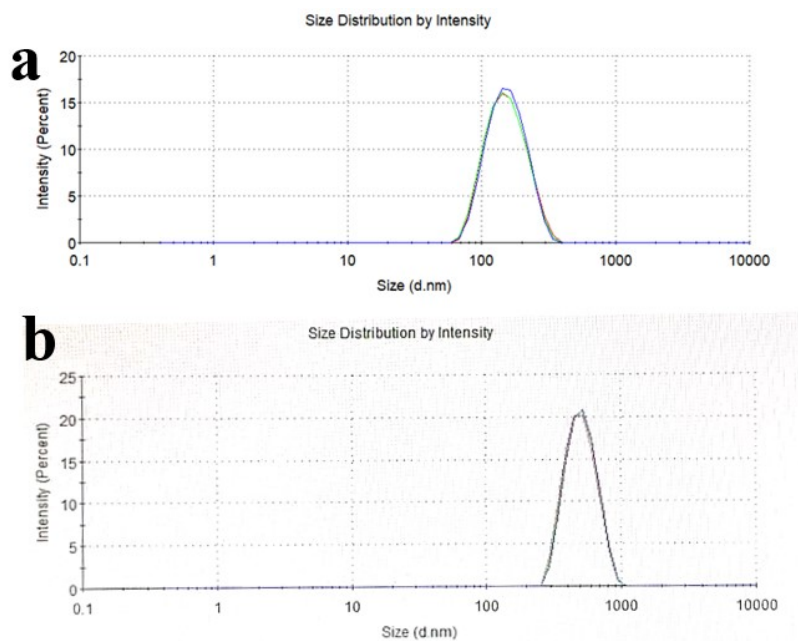

Fig. S2. The hydrodynamic diameter of  $\text{Fe}_3\text{O}_4$  nanoparticles (a) and  $\text{Fe}_3\text{O}_4@\text{NaYF}_4:\text{Tb}$  nanoparticles (b) measured by DLS.

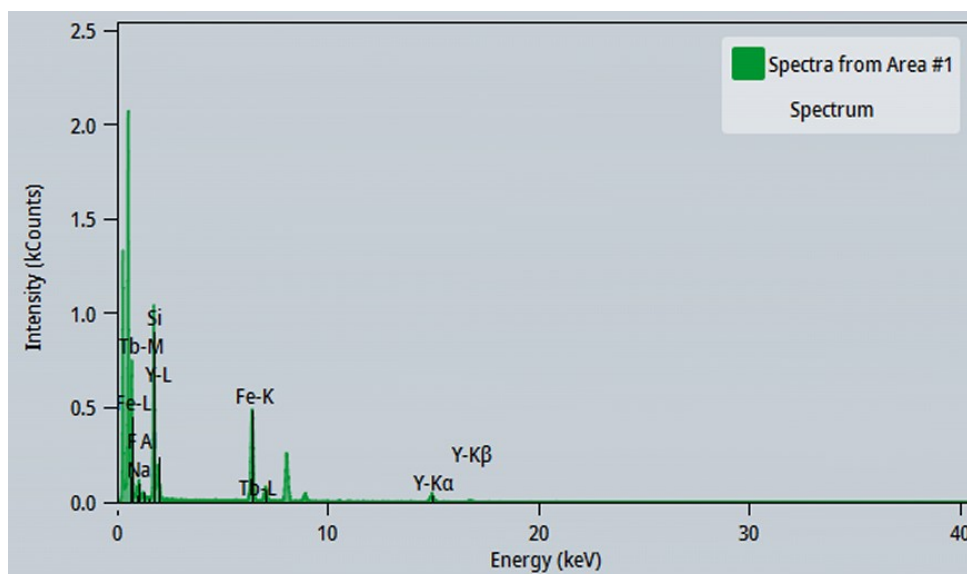

Fig. S3. The EDS analysis for element composition of the  $\text{Fe}_3\text{O}_4@\text{SiO}_2@\text{NaYF}_4:\text{Tb}$ .

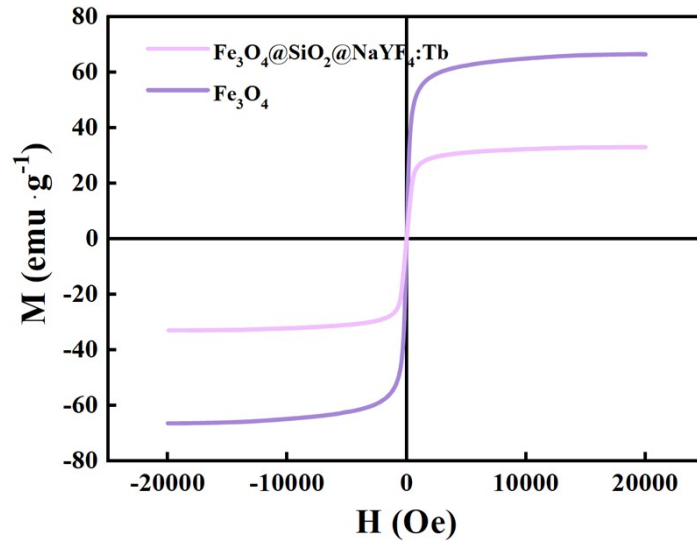

Fig. S4. Magnetic hysteresis loop images of Fe<sub>3</sub>O<sub>4</sub> nanoparticles and Fe<sub>3</sub>O<sub>4</sub>@SiO<sub>2</sub>@NaYF<sub>4</sub>:Tb nanoparticles.

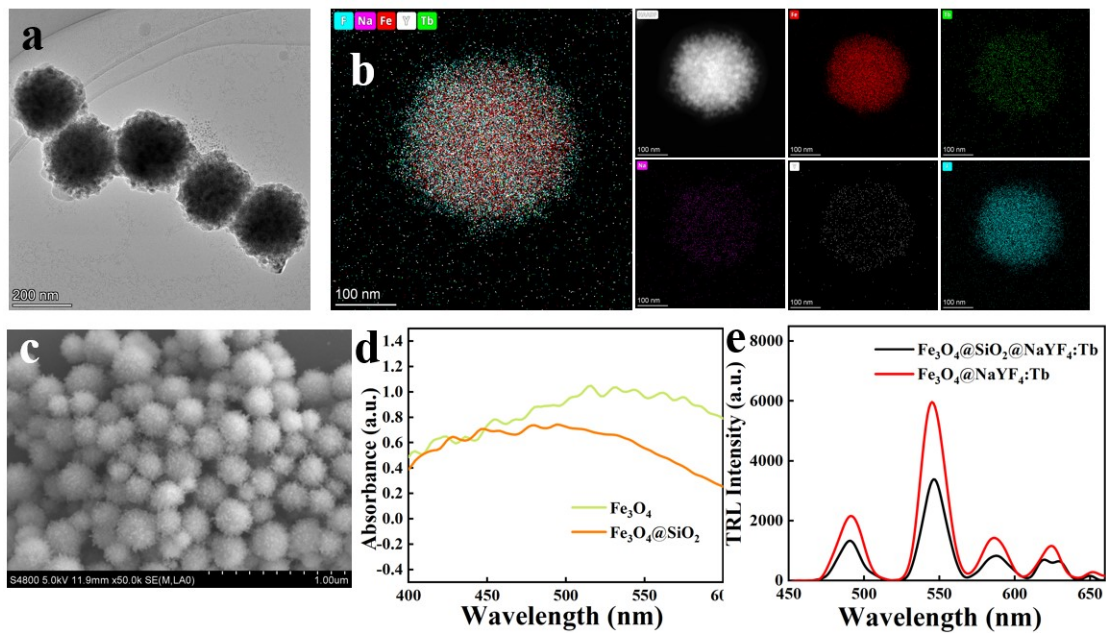

Fig. S5. TEM (a) and SEM (c) images of Fe<sub>3</sub>O<sub>4</sub>@NaYF<sub>4</sub>:Tb nanoparticles. (b) EDS analyses of the Fe<sub>3</sub>O<sub>4</sub>@NaYF<sub>4</sub>:Tb nanoparticles. (d) UV-vis absorbance spectra of Fe<sub>3</sub>O<sub>4</sub> nanoparticles and Fe<sub>3</sub>O<sub>4</sub>@SiO<sub>2</sub> nanoparticles. (e) The time-resolved luminescence spectrum of Fe<sub>3</sub>O<sub>4</sub>@NaYF<sub>4</sub>:Tb nanoparticles and Fe<sub>3</sub>O<sub>4</sub>@SiO<sub>2</sub>@NaYF<sub>4</sub>:Tb nanoparticles.

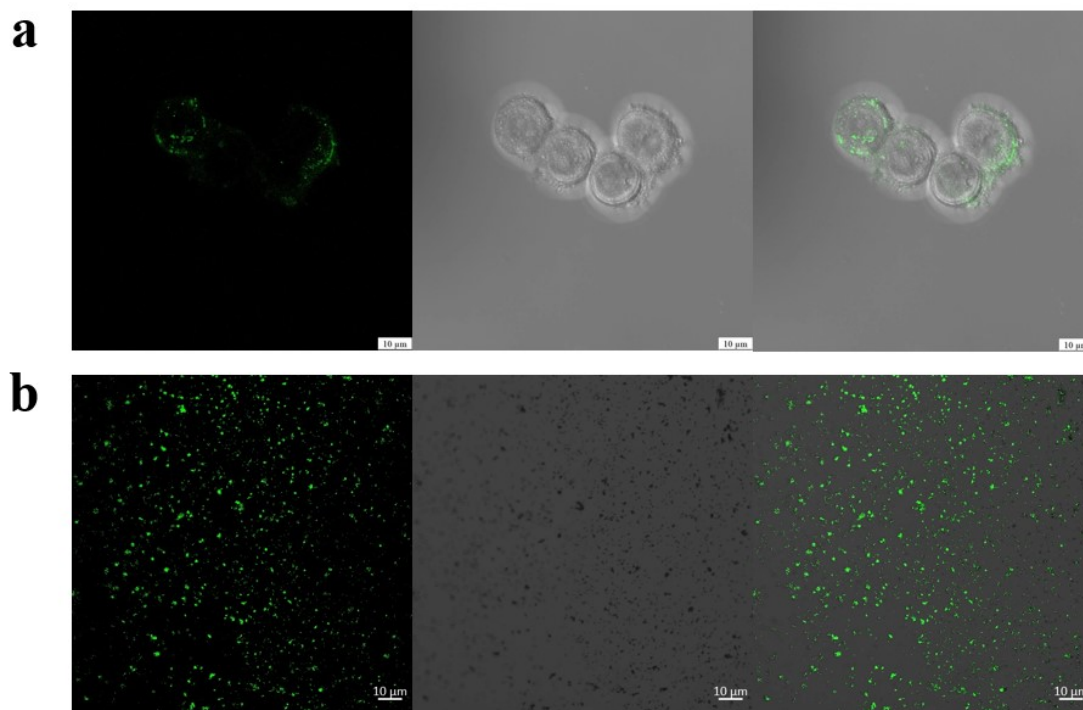

Fig. S6. CLSM images of (a) MCF-7 cells incubated with Apt<sub>EPCAM</sub>-FAM and (b) MLS@Apt<sub>EPCAM</sub>-FAM.

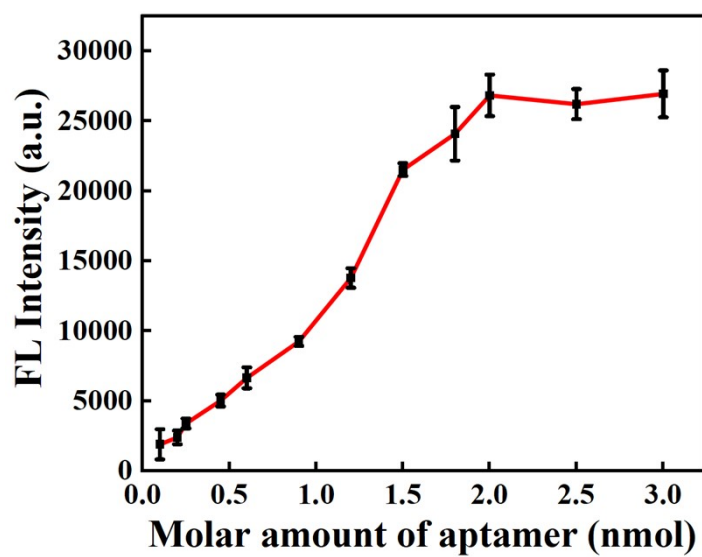

Fig. S7. Optimization of the amount of the Apt<sub>EPCAM</sub> loaded on Fe<sub>3</sub>O<sub>4</sub>@SiO<sub>2</sub>@NaYF<sub>4</sub>:Tb nanoparticles.

### Magnetic recovery efficiency testing of MLS

First, UV-visible absorption spectra (wavelength scan, slit width 5 nm) of MLS at different concentrations were obtained to establish a standard curve. Then, absorbance

values of the supernatant at different magnetic separation times were recorded and the established standard curve was used to calculate the corresponding concentrations and recovery efficiency of MLS:

$$\frac{\text{concentration of MLS before magnetic separation} - \text{initial concentration of MLS}}{\text{concentration of MLS before magnetic separation}} \times 100\%$$

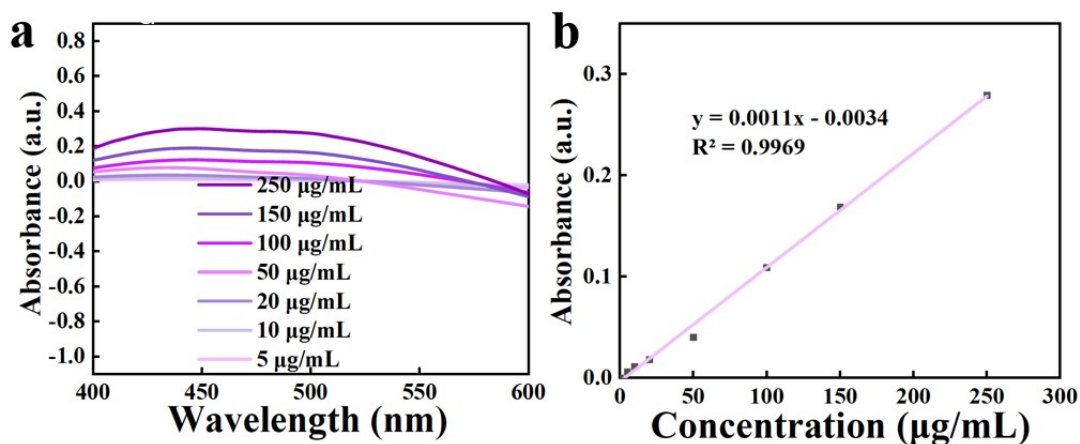

Fig. S8. UV-vis absorbance spectra (a) and (b) corresponding linear relationship of different concentrations of MLS.

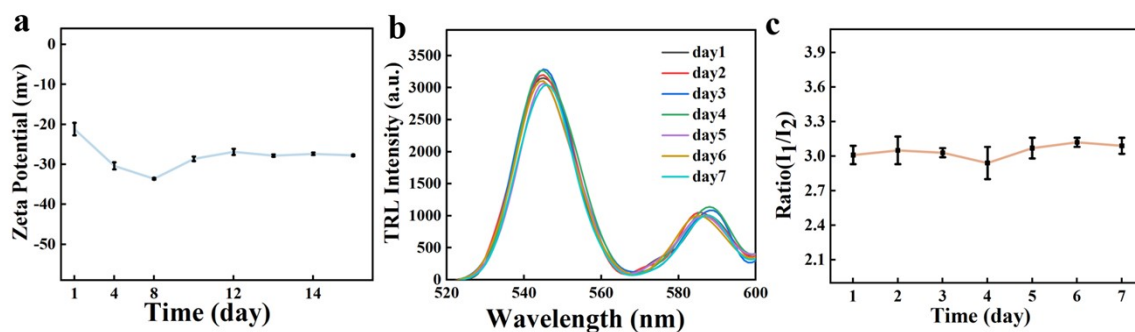

Fig. S9. Storage stability curve of MLS. (a) Zeta potential stability and (b-c) TRL stability.

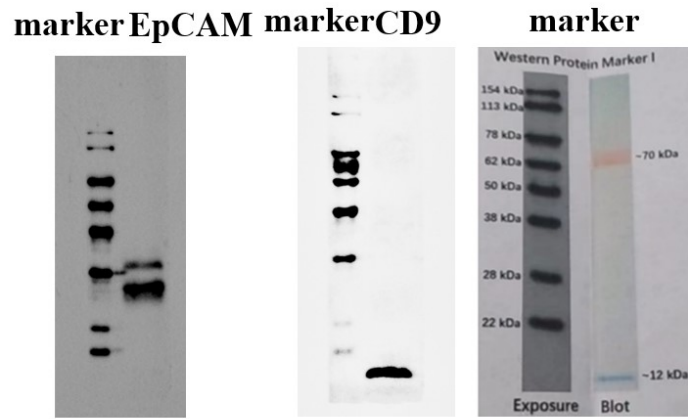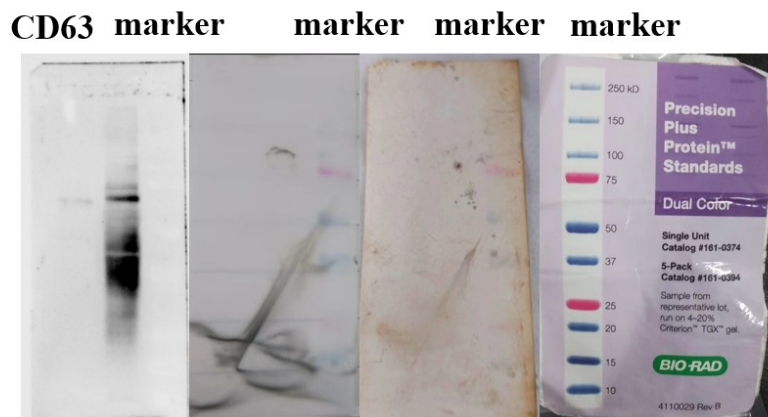

Fig. S10. The raw data of western blotting experiments for demonstrating the two exosomal proteins and one epithelial cancer-associated protein on MCF-7 exosomes.

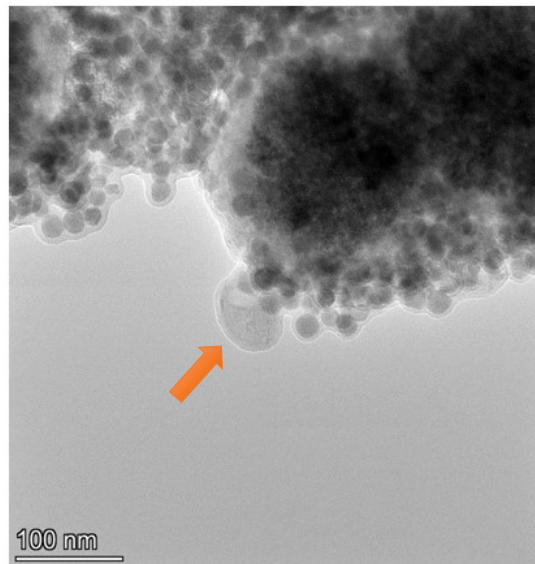

Fig. S11. TEM image of the MLS@exo, and one captured exosome was pointed out by an arrow.

Tab. S1 The TRL intensity experimental results in model samples.

| <b>Number of Exosomes</b> | <b>Peak value at 543 nm (I<sub>1</sub>) (repeated 3 times)</b> | <b>Peak value at 583 nm (I<sub>2</sub>) (repeated 3 times)</b> | <b>Ratio (I<sub>1</sub>/I<sub>2</sub>)</b> | <b>Average Ratio</b> | <b>STDEV</b> | <b>RSD (%)</b> |
|---------------------------|----------------------------------------------------------------|----------------------------------------------------------------|--------------------------------------------|----------------------|--------------|----------------|
| 2.3 × 10 <sup>2</sup>     | 3495                                                           | 1129                                                           | 3.096                                      | 3.162                | 0.0605       | 1.91           |
|                           | 3515                                                           | 1116                                                           | 3.150                                      |                      |              |                |
|                           | 3589                                                           | 1107                                                           | 3.242                                      |                      |              |                |
| 2.3 × 10 <sup>3</sup>     | 3748                                                           | 1113                                                           | 3.367                                      | 3.369                | 0.0371       | 1.10           |
|                           | 3727                                                           | 1121                                                           | 3.325                                      |                      |              |                |
|                           | 3781                                                           | 1107                                                           | 3.415                                      |                      |              |                |
| 2.3 × 10 <sup>4</sup>     | 4040                                                           | 1132                                                           | 3.569                                      | 3.541                | 0.0512       | 1.44           |
|                           | 4038                                                           | 1164                                                           | 3.469                                      |                      |              |                |
|                           | 4047                                                           | 1129                                                           | 3.584                                      |                      |              |                |
| 2.3 × 10 <sup>5</sup>     | 4462                                                           | 1188                                                           | 3.756                                      | 3.746                | 0.0325       | 0.87           |
|                           | 4441                                                           | 1175                                                           | 3.779                                      |                      |              |                |
|                           | 4446                                                           | 1201                                                           | 3.702                                      |                      |              |                |
| 2.3 × 10 <sup>6</sup>     | 4651                                                           | 1216                                                           | 3.825                                      | 3.822                | 0.0187       | 0.49           |
|                           | 4666                                                           | 1214                                                           | 3.843                                      |                      |              |                |
|                           | 4660                                                           | 1227                                                           | 3.798                                      |                      |              |                |
| 2.3 × 10 <sup>7</sup>     | 4941                                                           | 1252                                                           | 3.947                                      | 3.993                | 0.0332       | 0.83           |
|                           | 4993                                                           | 1241                                                           | 4.023                                      |                      |              |                |
|                           | 5002                                                           | 1248                                                           | 4.008                                      |                      |              |                |
| 2.3 × 10 <sup>9</sup>     | 5373                                                           | 1271                                                           | 4.227                                      | 4.202                | 0.0178       | 0.42           |
|                           | 5368                                                           | 1281                                                           | 4.190                                      |                      |              |                |
|                           | 5391                                                           | 1287                                                           | 4.189                                      |                      |              |                |

\* *STDEV*: Standard Deviation, *RSD*: relative standard deviation.

Tab. S2 Information of clinical samples.

| <b>Sample</b> | <b>Type</b>   | <b>Gender</b> | <b>Age</b> |
|---------------|---------------|---------------|------------|
| <b>H1</b>     | Health        | Male          | 31         |
| <b>H2</b>     | Health        | Male          | 34         |
| <b>H3</b>     | Health        | Female        | 45         |
| <b>H4</b>     | Health        | Female        | 28         |
| <b>H5</b>     | Health        | Female        | 36         |
| <b>B1</b>     | Breast Cancer | Female        | 48         |
| <b>B2</b>     | Breast Cancer | Female        | 85         |
| <b>B3</b>     | Breast Cancer | Female        | 67         |
| <b>B4</b>     | Breast Cancer | Female        | 50         |
| <b>B5</b>     | Breast Cancer | Female        | 69         |
| <b>L1</b>     | Liver Cancer  | Female        | 50         |
| <b>L2</b>     | Liver Cancer  | Female        | 58         |
| <b>L3</b>     | Liver Cancer  | Female        | 49         |
| <b>L4</b>     | Liver Cancer  | Male          | 70         |
| <b>L5</b>     | Liver Cancer  | Male          | 50         |

\



Tab. S3 The TRL experimental results in real samples.

| Samples                                               |           | Peak value at<br>543 nm (I <sub>1</sub> ) | Peak value at<br>583 nm (I <sub>2</sub> ) | Ratio<br>(I <sub>1</sub> /I <sub>2</sub> ) | Average<br>Ratio | STDEV | RSD<br>(%) |
|-------------------------------------------------------|-----------|-------------------------------------------|-------------------------------------------|--------------------------------------------|------------------|-------|------------|
| <b>Health</b>                                         | <b>H1</b> | 4480                                      | 1320                                      | 3.394                                      | 3.427            | 0.155 | 4.522      |
|                                                       | <b>H2</b> | 4073                                      | 1297                                      | 3.140                                      |                  |       |            |
|                                                       | <b>H3</b> | 4342                                      | 1218                                      | 3.565                                      |                  |       |            |
|                                                       | <b>H4</b> | 4134                                      | 1184                                      | 3.491                                      |                  |       |            |
|                                                       | <b>H5</b> | 4334                                      | 1223                                      | 3.544                                      |                  |       |            |
| <b>Breast<br/>cancer</b>                              | <b>B1</b> | 4455                                      | 1133                                      | 3.932                                      | 3.977            | 0.101 | 2.554      |
|                                                       | <b>B2</b> | 4753                                      | 1165                                      | 4.080                                      |                  |       |            |
|                                                       | <b>B3</b> | 4327                                      | 1134                                      | 3.816                                      |                  |       |            |
|                                                       | <b>B4</b> | 4929                                      | 1205                                      | 4.090                                      |                  |       |            |
|                                                       | <b>B5</b> | 5105                                      | 1287                                      | 3.966                                      |                  |       |            |
| <b>Liver<br/>cancer</b>                               | <b>L1</b> | 4820                                      | 1165                                      | 4.137                                      | 4.253            | 0.095 | 2.228      |
|                                                       | <b>L2</b> | 5196                                      | 1235                                      | 4.207                                      |                  |       |            |
|                                                       | <b>L3</b> | 5272                                      | 1205                                      | 4.375                                      |                  |       |            |
|                                                       | <b>L4</b> | 5334                                      | 1273                                      | 4.190                                      |                  |       |            |
|                                                       | <b>L5</b> | 5031                                      | 1155                                      | 4.356                                      |                  |       |            |
| <b>RSD between the health and breast cancer (%)</b>   |           |                                           |                                           |                                            |                  |       | 7.429      |
| <b>RSD between the health and liver cancer (%)</b>    |           |                                           |                                           |                                            |                  |       | 10.758     |
| <b>RSD between breast cancer and liver cancer (%)</b> |           |                                           |                                           |                                            |                  |       | 4.120      |

\* *STDEV*: Standard Deviation, *RSD*: relative standard deviation.
